# Supplementary material
Source: HighWire-hosted journal article supplement (http://www.qdcxjkg.com/highwire/filestream/113396/field_highwire_adjunct_files/0/ERJ_01285-2012_Disclosures.pdf)
Supplement: ERJ_01285-2012_Disclosures.pdf [file ERJ_01285-2012_Disclosures.pdf]

M.I. Polkey is planning a t'ai chi study with Professor Luo (Guangzhou, China).
